# Supplementary material
Source: Springer Nature journal article supplement (https://www.springermedizin.de/resource/supplementary/12936_2009_1016_MOESM1_ESM.pdf/9548784)

## a) Entomological

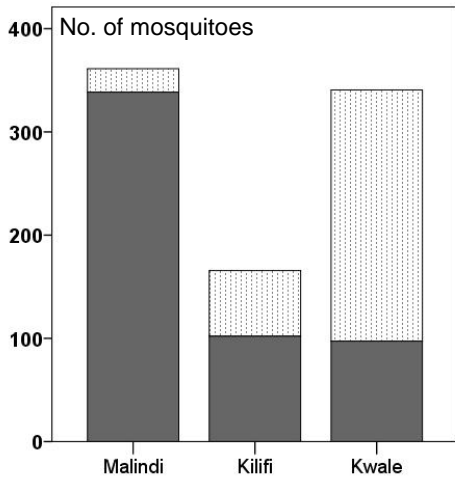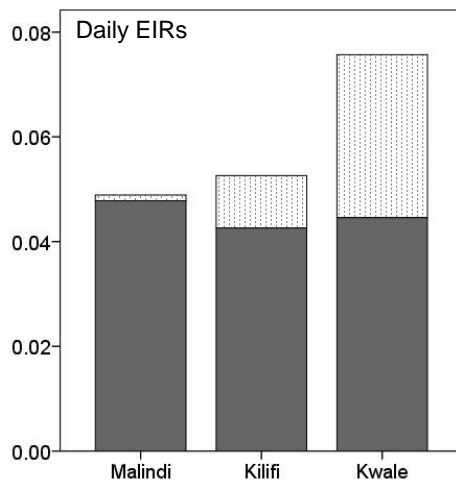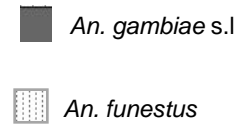

## b) Environmental

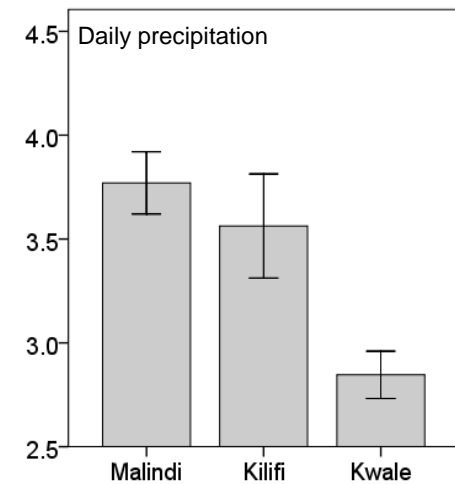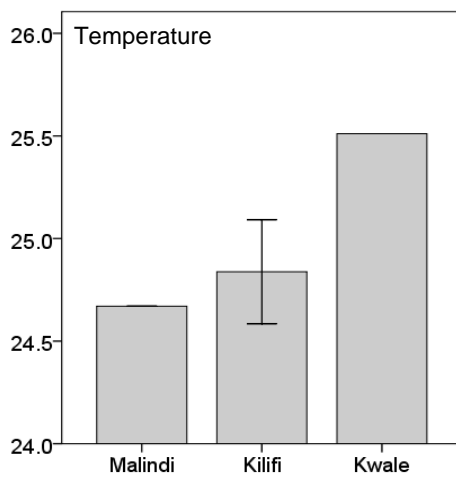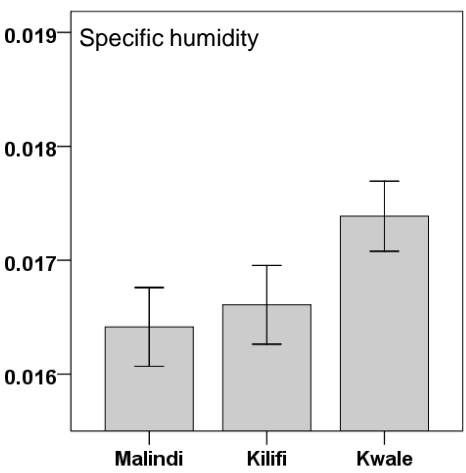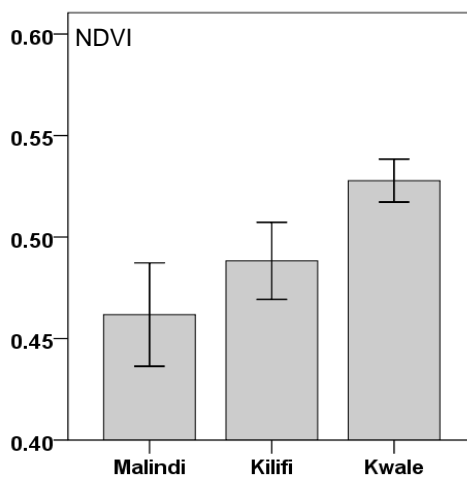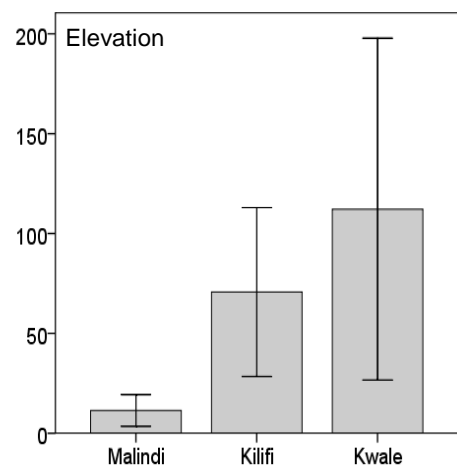

Supplement: MOESM1 [file 9548784]
